# Supplementary material for: Can delirium research activity impact on routine delirium recognition? A prospective cohort study
Source: PubMed Central journal article supplement — BMJ Open. 2018 Oct 31;8(10):e023386. doi: 10.1136/bmjopen-2018-023386 (PMC6252640; doi:10.1136/bmjopen-2018-023386), 2018-10-31
Supplement: bmjopen-2018-023386.draft_revisions.pdf [file bmjopen-2018-023386.draft_revisions.pdf]

# BMJ Open

BMJ Open is committed to open peer review. As part of this commitment we make the peer review history of every article we publish publicly available.

When an article is published we post the peer reviewers' comments and the authors' responses online. We also post the versions of the paper that were used during peer review. These are the versions that the peer review comments apply to.

The versions of the paper that follow are the versions that were submitted during the peer review process. They are not the versions of record or the final published versions. They should not be cited or distributed as the published version of this manuscript.

BMJ Open is an open access journal and the full, final, typeset and author-corrected version of record of the manuscript is available on our site with no access controls, subscription charges or pay-per-view fees (<http://bmjopen.bmj.com>).

If you have any questions on BMJ Open's open peer review process please email [info.bmjopen@bmj.com](mailto:info.bmjopen@bmj.com)

# BMJ Open

## Can delirium research activity impact on routine delirium recognition? A prospective cohort study

|                               |                                                                                                                        |
|-------------------------------|------------------------------------------------------------------------------------------------------------------------|
| Journal:                      | <i>BMJ Open</i>                                                                                                        |
| Manuscript ID                 | bmjopen-2018-023386                                                                                                    |
| Article Type:                 | Research                                                                                                               |
| Date Submitted by the Author: | 05-Apr-2018                                                                                                            |
| Complete List of Authors:     | Welch, Carly; University of Birmingham, Institute of Inflammation and Ageing<br>Jackson , T; University of Birmingham, |
| Keywords:                     | Delirium & cognitive disorders < PSYCHIATRY, Dementia < NEUROLOGY, STATISTICS & RESEARCH METHODS                       |
|                               |                                                                                                                        |

SCHOLARONE™  
Manuscripts

Peer review only

## Can delirium research activity impact on routine delirium recognition? A prospective cohort study

### Authors

Dr Carly Welch<sup>1</sup> and Dr Thomas A Jackson<sup>1</sup>

<sup>1</sup>Institute of Inflammation and Ageing  
College of Medical and Dental Sciences  
University of Birmingham  
Edgbaston  
Birmingham  
B15 2TT

Corresponding author:

Dr Carly Welch

Email: [welchc@bham.ac.uk](mailto:welchc@bham.ac.uk)

Tel: 0121 414 3344

Other author:

Dr Thomas A Jackson

Email: [t.jackson@bham.ac.uk](mailto:t.jackson@bham.ac.uk)

Word count: 1728

### Abstract

**Objective:** To assess if ongoing delirium research activity within an acute admissions unit impacts upon prevalent delirium recognition

**Design:** Prospective cohort study

**Setting:** Single site tertiary university teaching hospital

**Participants:** 125 patients with delirium, as diagnosed by an expert using DSM-IV reference criteria, were recruited to a prospective cohort study investigating use of informant tools to detect unrecognised dementia. This study evaluated recognition of delirium and documentation of delirium by medical staff.

**Interventions:** The main study followed an observational design; the intervention discussed was the implementation of this study itself.

**Primary and secondary outcome measures:** The primary outcome was recognition of delirium by the admitting medical team prior to study diagnosis. Secondary outcomes included recording of or

1  
2  
3 description of delirium in discharge summaries, and factors which may be associated with  
4 unrecognised delirium.

5  
6 **Results:** Delirium recognition improved between the first half (48%) and second half (71%) of  
7 recruitment ( $p=0.01$ ). There was no difference in recording of delirium or description of delirium in  
8 the text of discharge summaries.

9  
10 **Conclusion:** Delirium research activity can improve recognition of delirium. This has the potential to  
11 improve patient outcomes.

## 12 13 14 **Article summary - strengths and limitations**

- 15  
16  
17  
18 • This is the first study to demonstrate the impact of delirium research activity upon delirium  
19 recognition.
- 20 • Delirium was diagnosed in this study by an expert using DSM-IV reference criteria. Results,  
21 therefore, represent true delirium recognition.
- 22 • Due to the design of this study, we did not measure delirium recognition rates prior to or  
23 after recruitment to the main study. We do not know if the effect was maintained following  
24 completion of the main study.

## 25 26 27 28 **Background**

29  
30  
31  
32 Hospital trusts with high clinical research activity have better patient outcomes (1-4). Reasons for  
33 this association remain undetermined. The effect remains after adjustment for staffing, radiology  
34 service provision, operating theatres and critical care beds (1). Patient outcomes might be improved  
35 by increased local awareness of research topics (1-4).

36  
37  
38  
39 Delirium is an acute severe neuropsychiatric syndrome. It is defined by the Diagnostic and Statistical  
40 Manual of Mental Disorders (DSM V) as acute onset fluctuating symptoms of disturbed arousal and  
41 awareness, and cognitive impairment (5). Delirium affects 20% of hospitalised adults (6), not  
42 including Intensive Care Unit (ICU) admissions; prevalence within ICU rises to 80% (7). Delirium  
43 prevalence also increases with age (8). However, delirium remains under-recognised in practice (6,  
44 9-12).

45  
46  
47  
48 Unrecognised delirium, delayed delirium treatment, and increased delirium duration are associated  
49 with increased mortality (13-16). Delirium recognition ensures careful evaluation of precipitating  
50 factors and implementation of prevention strategies to avoid worsening of delirium (8, 17).  
51 Recognition can thus assist to shorten delirium duration and improve outcomes. Delirium has been  
52 shown to be under-recognised in 30-75% of patients (6, 9-12), and is also under-reported in the NHS  
53 (18). It is recommended that any diagnosis of delirium made in secondary care be clearly  
54 communicated to primary care (19).

## Methods

### *Objective*

This study aimed to assess if ongoing delirium research activity within an acute admissions unit could impact upon prevalent delirium recognition. We also aimed to explore factors which may be associated with unrecognised delirium.

### *Study design and setting*

The study design for the main study has been described elsewhere (20). Briefly, patients aged 70 and older were screened for evidence of delirium within 24 hours of admission to the acute medical admissions unit at Queen Elizabeth Hospital Birmingham (QEHB). Delirium was diagnosed using DSM-IV reference criteria by an expert consultant geriatrician (TAJ). Patients with delirium were recruited to a prospective cohort study investigating use of informant tools to detect unrecognised dementia. Acute Mental Test Score (AMTS), digit span score, and presence or absence of delirium were recorded in the medical notes of all screened patients. These findings were recorded regardless of whether or not they were recruited to the main study. Clinicians were not specifically educated about delirium whilst the study was ongoing, but had the opportunity to access notes of recruited patients and consult study literature.

### *Data abstraction*

Delirium recognition was defined as a written diagnosis of delirium documented in the patient care record by the usual care team during the first 24 hours of admission, prior to screening for study purposes. Healthcare staff outside of the research team were unaware that delirium recognition was being assessed or recorded. Delirium motor subtype and dementia status, using IQCODE-SF > 3.82(20), were recorded. Following discharge, formal discharge letters were examined for documentation of delirium as a discharge diagnosis. Text was examined for description of delirium using informal terms. In cases where patients died during admission, the medical certificate of cause of death and letter to GP were examined. Analysis of discharge summaries was completed by a single researcher (CW) who was unaware if delirium had been recognised on admission.

### *Statistical analysis*

Admissions were divided into categorical halves and quartiles of consecutive recruitment for analysis. Due to an odd total number, the additional participant was randomly allocated to the first

1  
2  
3 half and the final quartile. Significance of differences in delirium recognition across groups were  
4 examined using Fisher's exact test and Chi-squared tests as appropriate using IBM SPSS Statistics 22.  
5 Data was examined with respect to differences between age, gender, delirium motor subtype, and  
6 dementia status between groups, and between recognised and unrecognised delirium. If any  
7 significant differences were found between those recognised and unrecognised, we planned logistic  
8 regression models to identify factors that predicted unrecognised delirium.  
9

### 10 11 12 *Patient involvement*

13  
14  
15 The James Lind Alliance published priority setting partnerships related to dementia in 2013, which  
16 informed further work led by the Alzheimer's society. It was identified that some of most important  
17 priorities to patients and carers of individuals with dementia were the impact of early diagnosis,  
18 caring for people with dementia during acute hospital admissions, and how to effectively implement  
19 research findings into practice (21). Locally, a pilot study of nine individuals was undertaken prior to  
20 the initial study, which demonstrated that patients and their consultees found the assessments  
21 acceptable. Written consultee declaration was obtained from personal consultees for research  
22 participation where patients were deemed to lack capacity to consent. The results of the main study  
23 were presented at the Age Well conference in Birmingham and disseminated to study participants  
24 and their consultees.  
25  
26  
27  
28

### 29 **Results**

30  
31  
32  
33 Delirium was diagnosed in 228 (17.2%) of 1,327 patients screened for delirium. 125 participants  
34 were recruited between March 2013 and November 2014. Reasons for non-recruitment included  
35 lack of available consultees, risk of imminent death, inability to communicate in English, consultee  
36 declining participation, or previous recruitment. This has been described elsewhere in more detail  
37 (20). Table 1 depicts demographic data, delirium subtype, dementia status, and delirium recognition  
38 between groups. There was no difference in age, gender, delirium subtype, dementia status or  
39 mortality between the two halves.  
40  
41  
42

### 43 *Admission recognition*

44  
45  
46 Delirium was recognised in 74/125 (59%) overall. Delirium was recognised in 30/63 (48%) in the first  
47 half, and 44/62 (71%) in the second half ( $p=0.01$ ). There was no difference in age, gender, delirium  
48 subtype, dementia status, or mortality between recognised or unrecognised delirium (Table 1). Table  
49 2 demonstrates our results divided by quartiles. Delirium recognition improved from the first  
50 quartile when compared to the second, third, and fourth quartiles (42%, 52%, 74%, 69%,  $p=0.034$ ).  
51 Motor subtype was specified on admission in 8 patients with delirium; seven of these were  
52 concordant with expert assessment at recruitment (all hypoactive).  
53  
54  
55  
56  
57  
58  
59  
60

### *Discharge documentation*

There was no difference in recording of delirium as a diagnosis, or description of delirium in discharge summaries between the first and second halves of recruitment. There was a trend towards increased documentation of delirium as a discharge diagnosis in the second, third, and fourth quartiles compared to the first quartile (29%, 55%, 48%, 62%,  $p=0.052$ ). There was a clinical description of delirium in the discharge text of 62/113 (55%) patients. Of these patients, confusion was described in 56/62 (88%), drowsiness in 12/62 (19%), and agitation in 5/62 (8%). No patients were described as being disorientated. Of the 12 in whom drowsiness was described, all except for one patient had a diagnosis of hypoactive delirium confirmed with expert assessment. 12 patients died during admission. None of these included delirium as a diagnosis that had caused or contributed towards their death on formal death certification, or included delirium in summaries sent to the GP in relation to the admission.

### **Discussion**

Delirium recognition improved between the first half of recruitment and second half. There was no change in local trust policy during this time period that may have affected this. Formal delirium diagnosis was made during the initial study using recognised DSM-IV criteria by an expert; results are representative of true delirium recognition. Increased knowledge of delirium through awareness of ongoing recruitment to the main study may have aided to increase recognition. This demonstrates a potentially indirect means by which increased local research activity can improve patient outcomes.

Documentation of delirium in discharge summaries did not improve during this study. This may have been due to patients being discharged from clinical areas other than the acute admissions unit, and reduced awareness by discharging physicians of the main study. However, many medical staff working in discharging areas would have rotated through the acute admissions unit. Medical staff may have been unaware of the importance of documenting delirium on discharge summaries, as this was not an aspect included in the main study. To minimise potential bias, examination of discharge summaries was performed by a separate independent researcher who was not aware of the results of the admission recognition data.

Overall rates of delirium recognition compared better than previous research in other settings. The development of NICE guidelines in 2010 (19) and increased undergraduate teaching (22) are likely to have influenced this. We did not conduct follow-up assessments following completion of this study to assess if the effect was maintained. Baseline recognition rates prior to recruitment to this study were also not measured. Due to the design of this study, we were only able to assess the impact of our study upon recognition of prevalent delirium in patients included within the main study. We also did not assess the impact upon recognition of incident delirium or prevalent delirium in patients not included in the main study.

1  
2  
3 We did not demonstrate a significant difference in recognition of delirium between subtypes. This is  
4 in contrast to previous research, which has demonstrated that hypoactive delirium is recognised less  
5 frequently than other subtypes (11). However, our study was not powered to detect a difference in  
6 recognition between subtypes. A non-significant difference of 52% recognition amongst hypoactive  
7 patients compared to 67% recognition amongst hyperactive and mixed subtypes was observed  
8 overall.  
9

10  
11  
12 This is the first study to show the effect of delirium research activity on delirium recognition. Our  
13 results correspond to previous studies that have demonstrated a positive effect of research activity  
14 on patient outcomes. Further research is needed to assess if similar effects are observed with  
15 research studies of alternative design. Demonstrating positive indirect benefits of research activity  
16 on patient outcomes may encourage increased engagement of hospital trusts in research.  
17  
18

### 19 20 **Funding**

21  
22  
23 TAJ was supported jointly by the Research into Ageing Fund, a fund set up and managed by Age UK  
24 and the British Geriatrics Society (#367). The study sponsor had no role in either study design; the  
25 collection, analysis and interpretation of data; the writing of the report and in the decision to submit  
26 the paper for publication. CW is funded by a National Institute for Health Research (NIHR), UK,  
27 Academic Clinical Fellowship award. The views expressed are those of the authors and not  
28 necessarily those of the National Health Service (NHS), the NIHR or the Department of Health.  
29  
30

### 31 32 33 **Competing interests**

34  
35  
36 The authors declare that they have no competing interests.  
37  
38

### 39 40 **Author contributions**

41  
42  
43 TAJ was responsible for recruitment of patients to this study and recording of delirium recognition.  
44 CW was responsible for review of delirium documentation on discharge summaries. TAJ and CW  
45 jointly performed the analysis and agreed the text of the manuscript.  
46  
47

### 48 49 **Ethical approval**

50  
51  
52 This study involved participants who lacked capacity to consent; written consultee declaration was  
53 obtained from personal consultees. Ethical and regulatory approvals were obtained (Bradford Ethics  
54 Committee, part of the Yorkshire and Humber National research and Ethics Service, ref:  
55 12/YH/0534).  
56  
57



1  
2  
3  
4  
5  
6  
7  
8  
9  
10  
11  
12  
13  
14  
15  
16  
17  
18  
19  
20  
21  
22  
23  
24  
25  
26  
27  
28  
29  
30  
31  
32  
33  
34  
35  
36  
37  
38  
39  
40  
41  
42  
43  
44  
45  
46  
47  
48  
49  
50  
51  
52  
53  
54  
55  
56  
57  
58  
59  
60

**Data sharing statement**

The datasets used and analysed during the current study are available from the corresponding author on reasonable request.

For peer review only

Table 1 – Comparison of results and patient demographics by halves

|                                 |             | All             | First half<br>n=63 | Second<br>half n=62 | p           | Recognised<br>n=74 | Unrecognised<br>n=51 | p    |
|---------------------------------|-------------|-----------------|--------------------|---------------------|-------------|--------------------|----------------------|------|
| Age                             | Mean (SD)   | 84.4            | 83.78              | 85.03               | 0.18        | 85 (5.8)           | 84 (7.4)             | 0.65 |
| Gender                          | Male        | 47 (38%)        | 27 (43%)           | 20 (32%)            | 0.27        | 27 (36%)           | 20 (39%)             | 0.85 |
| Subtype                         | Hyperactive | 37 (29%)        | 18 (29%)           | 19 (31%)            |             | 25 (34%)           | 12 (23%)             |      |
|                                 | Hypoactive  | 67 (54%)        | 34 (54%)           | 33 (53%)            | 0.96        | 35 (47%)           | 32 (63%)             | 0.23 |
|                                 | Mixed       | 21 (17%)        | 11 (17%)           | 10 (16%)            |             | 14 (19%)           | 7 (14%)              |      |
| IQCODE > 3.82                   |             | 71 (57%)        | 36 (57%)           | 35 (56%)            | 0.77        | 31 (42%)           | 15 (29%)             | 0.97 |
| Inpatient mortality             |             | 12 (10%)        | 5 (8%)             | 7 (11%)             | 0.73        | 8 (11%)            | 4 (8%)               | 0.76 |
| Delirium recognised             |             | <b>74 (59%)</b> | <b>30 (48%)</b>    | <b>44 (71%)</b>     | <b>0.01</b> | NA                 | NA                   | NA   |
| Delirium as discharge diagnosis |             | 61 (49%)        | 26 (41%)           | 35 (56%)            | 0.11        | NA                 | NA                   | NA   |
| Delirium described on discharge |             | 62 (50%)        | 33 (52%)           | 29 (47%)            | 0.59        | NA                 | NA                   | NA   |

Delirium recognition improved between the first half of recruitment to the second half of recruitment. There was no difference in age, gender, delirium subtype, dementia status, mortality between halves or recruitment or between recognised and unrecognised delirium.

**Table 2 – Comparison of results by quartiles**

|                                        | First quartile<br>(n=31) | Second<br>quartile<br>(n=31) | Third<br>quartile<br>(n=31) | Fourth<br>quartile<br>(n=32) | p value     |
|----------------------------------------|--------------------------|------------------------------|-----------------------------|------------------------------|-------------|
| <b>Delirium recognised</b>             | <b>13 (42%)</b>          | <b>16 (52%)</b>              | <b>23 (74%)</b>             | <b>22 (69%)</b>              | <b>0.03</b> |
| <b>Delirium as discharge diagnosis</b> | 9 (29%)                  | 17 (55%)                     | 15 (48%)                    | 20 (62%)                     | 0.052       |
| <b>Delirium described on discharge</b> | 18 (58%)                 | 14 (45%)                     | 12 (39%)                    | 18 (56%)                     | 0.37        |

Delirium recognition improved between the first quartile and the second, third and fourth quartile. There was a trend towards increased documentation of delirium as a discharge diagnosis between the first and the second, third and fourth quartiles.

## References

1. Ozdemir BA, Karthikesalingam A, Sinha S, Poloniecki JD, Hinchliffe RJ, Thompson MM, et al. Research Activity and the Association with Mortality. *PLOS ONE*. 2015;10(2):e0118253.
2. Lichten CA, Marsden G, Pollitt A, Kiparoglou V, Channon KM, Sussex J. Does a biomedical research centre affect patient care in local hospitals? *Health Research Policy and Systems*. 2017;15(1):2.
3. García-Romero A, Escribano Á, Tribó JA. The impact of health research on length of stay in Spanish public hospitals. *Research Policy*. 2017;46(3):591-604.
4. Boaz A, Hanney S, Jones T, Soper B. Does the engagement of clinicians and organisations in research improve healthcare performance: a three-stage review. *BMJ Open*. 2015;5(12).
5. American Psychiatric Association. *Diagnostic and Statistical Manual of Mental Disorders (DSM-5®)*. 5 ed 2013.
6. Ryan DJ, O'Regan NA, Caoimh RÓ, Clare J, O'Connor M, Leonard M, et al. Delirium in an adult acute hospital population: predictors, prevalence and detection. *BMJ Open*. 2013;3(1).
7. Ely E, Inouye SK, Bernard GR, et al. Delirium in mechanically ventilated patients: Validity and reliability of the confusion assessment method for the intensive care unit (cam-icu). *Jama*. 2001;286(21):2703-10.
8. MacLulich AM, Anand A, Davis DH, Jackson T, Barugh AJ, Hall RJ, et al. New horizons in the pathogenesis, assessment and management of delirium. *Age Ageing*. 2013;42(6):667-74.
9. Teodorczuk A, Reynish E, Milisen K. Improving recognition of delirium in clinical practice: a call for action. *BMC Geriatrics*. 2012;12(1):55.
10. Laurila JV, Pitkala KH, Strandberg TE, Tilvis RS. Detection and documentation of dementia and delirium in acute geriatric wards. *General hospital psychiatry*. 2004;26(1):31-5.
11. Collins N, Blanchard MR, Tookman A, Sampson EL. Detection of delirium in the acute hospital. *Age Ageing*. 2010;39(1):131-5.
12. Bellelli G, Nobili A, Annoni G, Morandi A, Djade CD, Meagher DJ, et al. Under-detection of delirium and impact of neurocognitive deficits on in-hospital mortality among acute geriatric and medical wards. *European journal of internal medicine*. 2015;26(9):696-704.
13. Heymann A, Radtke F, Schiemann A, Lutz A, MacGuill M, Wernecke KD, et al. Delayed treatment of delirium increases mortality rate in intensive care unit patients. *J Int Med Res*. 2010;38(5):1584-95.
14. Bellelli G, Nobili A, Annoni G, Morandi A, Djade CD, Meagher DJ, et al. Under-detection of delirium and impact of neurocognitive deficits on in-hospital mortality among acute geriatric and medical wards. *European Journal of Internal Medicine*. 2015;26(9):696-704.
15. Kakuma R, du Fort GG, Arsenault L, Perrault A, Platt RW, Monette J, et al. Delirium in older emergency department patients discharged home: effect on survival. *J Am Geriatr Soc*. 2003;51(4):443-50.
16. Jackson TA, Wilson D, Richardson S, Lord JM. Predicting outcome in older hospital patients with delirium: a systematic literature review. *Int J Geriatr Psychiatry*. 2016;31(4):392-9.
17. Inouye SK, Westendorp RG, Saczynski JS. Delirium in elderly people. *Lancet (London, England)*. 2014;383(9920):911-22.
18. Clegg A, Westby M, Young JB. Under-reporting of delirium in the NHS. *Age and Ageing*. 2011;40(2):283-6.
19. National Institute for health and Clinical Excellence (NICE). *Delirium: prevention, diagnosis and management - Clinical guideline [CG103]*. 2010.
20. Jackson TA, MacLulich AMJ, Gladman JRF, Lord JM, Sheehan B. Diagnostic test accuracy of informant-based tools to diagnose dementia in older hospital patients with delirium: a prospective cohort study. *Age and Ageing*. 2016;45(4):505-11.
21. James Lind Alliance. *Priority Setting Partnerships - Dementia Top 10*. NIHR Evaluation, Trials and Studies Coordinating Centre, 2013.

1  
2  
3  
4  
5  
6  
7  
8  
9  
10  
11  
12  
13  
14  
15  
16  
17  
18  
19  
20  
21  
22  
23  
24  
25  
26  
27  
28  
29  
30  
31  
32  
33  
34  
35  
36  
37  
38  
39  
40  
41  
42  
43  
44  
45  
46  
47  
48  
49  
50  
51  
52  
53  
54  
55  
56  
57  
58  
59  
60

22. Fisher JM, Gordon AL, MacLulich AM, Tullo E, Davis DH, Blundell A, et al. Towards an understanding of why undergraduate teaching about delirium does not guarantee gold-standard practice--results from a UK national survey. *Age Ageing*. 2015;44(1):166-70.

For peer review only

# Reporting checklist for cohort study.

Based on the STROBE cohort guidelines.

## Instructions to authors

Complete this checklist by entering the page numbers from your manuscript where readers will find each of the items listed below.

Your article may not currently address all the items on the checklist. Please modify your text to include the missing information. If you are certain that an item does not apply, please write "n/a" and provide a short explanation.

Upload your completed checklist as an extra file when you submit to a journal.

In your methods section, say that you used the STROBE cohort reporting guidelines, and cite them as:

von Elm E, Altman DG, Egger M, Pocock SJ, Gøtzsche PC, Vandenbroucke JP. The Strengthening the Reporting of Observational Studies in Epidemiology (STROBE) Statement: guidelines for reporting observational studies.

|                        |     | Reporting Item                                                                                                                  | Page Number |
|------------------------|-----|---------------------------------------------------------------------------------------------------------------------------------|-------------|
| Title                  | #1a | Indicate the study's design with a commonly used term in the title or the abstract                                              | 1           |
| Abstract               | #1b | Provide in the abstract an informative and balanced summary of what was done and what was found                                 | 1           |
| Background / rationale | #2  | Explain the scientific background and rationale for the investigation being reported                                            | 2           |
| Objectives             | #3  | State specific objectives, including any prespecified hypotheses                                                                | 3           |
| Study design           | #4  | Present key elements of study design early in the paper                                                                         | 3           |
| Setting                | #5  | Describe the setting, locations, and relevant dates, including periods of recruitment, exposure, follow-up, and data collection | 3           |
| Eligibility criteria   | #6a | Give the eligibility criteria, and the sources and methods of selection of participants. Describe methods of follow-up.         | 3           |

|    |                  |      |                                                                   |   |
|----|------------------|------|-------------------------------------------------------------------|---|
| 1  |                  | #6b  | For matched studies, give matching criteria and number of         | 3 |
| 2  |                  |      | exposed and unexposed                                             |   |
| 3  |                  |      |                                                                   |   |
| 4  |                  |      |                                                                   |   |
| 5  | Variables        | #7   | Clearly define all outcomes, exposures, predictors, potential     | 3 |
| 6  |                  |      | confounders, and effect modifiers. Give diagnostic criteria, if   |   |
| 7  |                  |      | applicable                                                        |   |
| 8  |                  |      |                                                                   |   |
| 9  |                  |      |                                                                   |   |
| 10 | Data sources /   | #8   | For each variable of interest give sources of data and details of | 3 |
| 11 | measurement      |      | methods of assessment (measurement). Describe                     |   |
| 12 |                  |      | comparability of assessment methods if there is more than one     |   |
| 13 |                  |      | group. Give information separately for for exposed and            |   |
| 14 |                  |      | unexposed groups if applicable.                                   |   |
| 15 |                  |      |                                                                   |   |
| 16 |                  |      |                                                                   |   |
| 17 |                  |      |                                                                   |   |
| 18 | Bias             | #9   | Describe any efforts to address potential sources of bias         | 3 |
| 19 |                  |      |                                                                   |   |
| 20 |                  |      |                                                                   |   |
| 21 | Study size       | #10  | Explain how the study size was arrived at                         | 3 |
| 22 |                  |      |                                                                   |   |
| 23 | Quantitative     | #11  | Explain how quantitative variables were handled in the            | 4 |
| 24 | variables        |      | analyses. If applicable, describe which groupings were chosen,    |   |
| 25 |                  |      | and why                                                           |   |
| 26 |                  |      |                                                                   |   |
| 27 |                  |      |                                                                   |   |
| 28 | Statistical      | #12a | Describe all statistical methods, including those used to control | 4 |
| 29 | methods          |      | for confounding                                                   |   |
| 30 |                  |      |                                                                   |   |
| 31 |                  |      |                                                                   |   |
| 32 |                  | #12b | Describe any methods used to examine subgroups and                | 4 |
| 33 |                  |      | interactions                                                      |   |
| 34 |                  |      |                                                                   |   |
| 35 |                  |      |                                                                   |   |
| 36 |                  | #12c | Explain how missing data were addressed                           | 4 |
| 37 |                  |      |                                                                   |   |
| 38 |                  | #12d | If applicable, explain how loss to follow-up was addressed        | 4 |
| 39 |                  |      |                                                                   |   |
| 40 |                  |      |                                                                   |   |
| 41 |                  | #12e | Describe any sensitivity analyses                                 | 4 |
| 42 |                  |      |                                                                   |   |
| 43 | Participants     | #13a | Report numbers of individuals at each stage of study—eg           | 4 |
| 44 |                  |      | numbers potentially eligible, examined for eligibility, confirmed |   |
| 45 |                  |      | eligible, included in the study, completing follow-up, and        |   |
| 46 |                  |      | analysed. Give information separately for for exposed and         |   |
| 47 |                  |      | unexposed groups if applicable.                                   |   |
| 48 |                  |      |                                                                   |   |
| 49 |                  |      |                                                                   |   |
| 50 |                  |      |                                                                   |   |
| 51 |                  | #13b | Give reasons for non-participation at each stage                  | 4 |
| 52 |                  |      |                                                                   |   |
| 53 |                  | #13c | Consider use of a flow diagram                                    | 4 |
| 54 |                  |      |                                                                   |   |
| 55 |                  |      |                                                                   |   |
| 56 | Descriptive data | #14a | Give characteristics of study participants (eg demographic,       | 8 |
| 57 |                  |      | clinical, social) and information on exposures and potential      |   |
| 58 |                  |      |                                                                   |   |
| 59 |                  |      |                                                                   |   |
| 60 |                  |      |                                                                   |   |

|                  |      |                                                                                                                                                                                                          |   |
|------------------|------|----------------------------------------------------------------------------------------------------------------------------------------------------------------------------------------------------------|---|
|                  |      | confounders. Give information separately for exposed and unexposed groups if applicable.                                                                                                                 |   |
|                  | #14b | Indicate number of participants with missing data for each variable of interest                                                                                                                          | 4 |
|                  | #14c | Summarise follow-up time (eg, average and total amount)                                                                                                                                                  | 4 |
| Outcome data     | #15  | Report numbers of outcome events or summary measures over time. Give information separately for exposed and unexposed groups if applicable.                                                              | 8 |
| Main results     | #16a | Give unadjusted estimates and, if applicable, confounder-adjusted estimates and their precision (eg, 95% confidence interval). Make clear which confounders were adjusted for and why they were included | 8 |
|                  | #16b | Report category boundaries when continuous variables were categorized                                                                                                                                    | 8 |
|                  | #16c | If relevant, consider translating estimates of relative risk into absolute risk for a meaningful time period                                                                                             | 8 |
| Other analyses   | #17  | Report other analyses done—e.g., analyses of subgroups and interactions, and sensitivity analyses                                                                                                        | 9 |
| Key results      | #18  | Summarise key results with reference to study objectives                                                                                                                                                 | 5 |
| Limitations      | #19  | Discuss limitations of the study, taking into account sources of potential bias or imprecision. Discuss both direction and magnitude of any potential bias.                                              | 5 |
| Interpretation   | #20  | Give a cautious overall interpretation considering objectives, limitations, multiplicity of analyses, results from similar studies, and other relevant evidence.                                         | 5 |
| Generalisability | #21  | Discuss the generalisability (external validity) of the study results                                                                                                                                    | 6 |
| Funding          | #22  | Give the source of funding and the role of the funders for the present study and, if applicable, for the original study on which the present article is based                                            | 6 |

The STROBE checklist is distributed under the terms of the Creative Commons Attribution License CC-BY. This checklist was completed on 04. April 2018 using <http://www.goodreports.org/>, a tool made by the [EQUATOR Network](#) in collaboration with [Penelope.ai](#)



# BMJ Open

## Can delirium research activity impact on routine delirium recognition? A prospective cohort study

|                                 |                                                                                                                        |
|---------------------------------|------------------------------------------------------------------------------------------------------------------------|
| Journal:                        | <i>BMJ Open</i>                                                                                                        |
| Manuscript ID                   | bmjopen-2018-023386.R1                                                                                                 |
| Article Type:                   | Research                                                                                                               |
| Date Submitted by the Author:   | 11-Jul-2018                                                                                                            |
| Complete List of Authors:       | Welch, Carly; University of Birmingham, Institute of Inflammation and Ageing<br>Jackson , T; University of Birmingham, |
| <b>Primary Subject Heading</b>: | Geriatric medicine                                                                                                     |
| Secondary Subject Heading:      | Diagnostics, Health services research, Research methods                                                                |
| Keywords:                       | Delirium & cognitive disorders < PSYCHIATRY, Dementia < NEUROLOGY, STATISTICS & RESEARCH METHODS                       |
|                                 |                                                                                                                        |

SCHOLARONE™  
Manuscripts

Peer Review Only

## Can delirium research activity impact on routine delirium recognition? A prospective cohort study

### Authors

Dr Carly Welch<sup>1</sup> and Dr Thomas A Jackson<sup>1</sup>

<sup>1</sup>Institute of Inflammation and Ageing  
College of Medical and Dental Sciences  
University of Birmingham  
Edgbaston  
Birmingham  
B15 2TT

Corresponding author:

Dr Carly Welch

Email: [welchc@bham.ac.uk](mailto:welchc@bham.ac.uk)

Tel: 0121 414 3344

Other author:

Dr Thomas A Jackson

Email: [t.jackson@bham.ac.uk](mailto:t.jackson@bham.ac.uk)

Word count: 2658

### Abstract

**Objective:** To assess if ongoing delirium research activity within an acute admissions unit impacts upon prevalent delirium recognition

**Design:** Prospective cohort study

**Setting:** Single site tertiary university teaching hospital

**Participants:** 125 patients with delirium, as diagnosed by an expert using DSM-IV reference criteria, were recruited to a prospective cohort study investigating use of informant tools to detect unrecognised dementia. This study evaluated recognition of delirium and documentation of delirium by medical staff.

**Interventions:** The main study followed an observational design; the intervention discussed was the implementation of this study itself.

**Primary and secondary outcome measures:** The primary outcome was recognition of delirium by the admitting medical team prior to study diagnosis. Secondary outcomes included recording of or

1  
2  
3 description of delirium in discharge summaries, and factors which may be associated with  
4 unrecognised delirium.

5  
6 **Results:** Delirium recognition improved between the first half (48%) and second half (71%) of  
7 recruitment ( $p=0.01$ ). There was no difference in recording of delirium or description of delirium in  
8 the text of discharge summaries.

9  
10 **Conclusion:** Delirium research activity can improve recognition of delirium. This has the potential to  
11 improve patient outcomes.

## 12 13 14 **Article summary - strengths and limitations**

- 15  
16  
17  
18 • This is the first study to demonstrate the impact of delirium research activity upon delirium  
19 recognition.
- 20 • Delirium was diagnosed in this study by an expert using DSM-IV reference criteria. Results,  
21 therefore, represent true delirium recognition.
- 22 • Due to the design of this study, we did not measure delirium recognition rates prior to or  
23 after recruitment to the main study. We do not know if the effect was maintained following  
24 completion of the main study.

## 25 26 27 28 **Background**

29  
30  
31  
32 Hospitals with high clinical research activity have better patient outcomes (1-4). Reasons for this  
33 association remain undetermined. The effect remains after adjustment for staffing, radiology service  
34 provision, operating theatres and critical care beds (1). Patient outcomes might be improved by  
35 locally increased clinical knowledge extrapolated from ongoing research projects or through  
36 increased morale amongst clinical staff involved in research (1-4). Research that aims to decipher the  
37 reasons for associations between research activity and patient outcomes is vital as findings can be  
38 used to improve patient outcomes in hospitals with less clinical research activity.

39  
40  
41  
42 Delirium is an acute severe neuropsychiatric syndrome. It has been defined most recently by the  
43 Diagnostic and Statistical Manual of Mental Disorders (DSM V) as disturbance in attention,  
44 awareness and cognition, which develops over a short time period (normally hours to days), is  
45 caused by direct physiological consequences of another medical condition, and is not better  
46 explained by another pre-existent neurocognitive disorder (5). Prior to this, delirium was defined by  
47 DSM IV as a disturbance of consciousness with a change in cognition or perceptual disturbance,  
48 which develops over an acute time period, tends to fluctuate and is caused by direct physiological  
49 consequences of another medical condition. Delirium affects 20% of hospitalised adults (6), not  
50 including Intensive Care Unit (ICU) admissions; prevalence within ICU rises to 80% (7). Delirium  
51 prevalence also increases with age (8). Delirium may be present on admission (prevalent delirium) or  
52 may develop during hospital admission (incident delirium), and may present as hyperactive, mixed,  
53 or hypoactive subtypes (9). However, delirium remains under-recognised in practice (6, 10-13).

1  
2  
3  
4  
5 Delirium is an independent risk factor for increased six-month mortality following hospitalisation of  
6 older adults (14). Particularly, unrecognised delirium, delayed delirium treatment, and increased  
7 delirium duration are associated with increased mortality (15-18). Delirium recognition ensures  
8 careful evaluation of precipitating factors and implementation of prevention strategies to avoid  
9 worsening of delirium (8, 19). Recognition can thus assist to shorten delirium duration and improve  
10 mortality and other outcomes (20). Delirium has been shown to be under-recognised in 30-75% of  
11 patients (6, 10-13), and is also under-reported in the National Health Service (NHS) (21). Previous  
12 research has shown that delirium recognition can be improved through educational interventions  
13 (22, 23). In addition, within the UK, it is recommended by the National Institute of Health and Care  
14 Excellence (NICE) that any diagnosis of delirium made in during a hospital admission be clearly  
15 communicated to their General Practitioner (GP) (24), this is important for follow-up and evaluation  
16 of underlying undiagnosed cognitive impairment (25). Identifying methods to improve delirium  
17 recognition and documentation can assist to improve patient outcomes.  
18  
19  
20

## 21 **Methods**

### 22 *Objective*

23  
24  
25  
26  
27  
28  
29 This study aimed to assess if ongoing delirium research activity within an acute admissions unit could  
30 impact upon prevalent delirium recognition. We also aimed to explore factors which may be  
31 associated with unrecognised delirium.  
32  
33

### 34 *Study design and setting*

35  
36  
37  
38 The study design for the main study has been described elsewhere (25). Briefly, patients aged 70 and  
39 older were screened for evidence of delirium within 24 hours of admission to the acute medical  
40 admissions unit at Queen Elizabeth Hospital Birmingham (QEHB). Delirium was diagnosed using  
41 DSM-IV reference criteria by an expert consultant geriatrician (TAJ). Patients with delirium were  
42 recruited to a prospective cohort study investigating use of informant tools to detect unrecognised  
43 dementia. Acute Mental Test Score (AMTS), digit span score, and presence or absence of delirium  
44 were recorded in the medical notes of all screened patients. These findings were recorded  
45 regardless of whether or not they were recruited to the main study. Screening for delirium for the  
46 purposes of this study took place only after the patient had been seen and assessed by the  
47 responsible medical team.  
48  
49

50  
51  
52 The researchers did not provide specific formal education or training about delirium diagnosis to  
53 clinicians outside of the research team. However, TAJ would frequently converse with clinicians  
54 working within the medical admissions unit who enquired about the research study and explain  
55 about the importance of recognising delirium. The results of delirium screening were very easily  
56 accessible to the clinical team, and where delirium was present, this was clearly documented with  
57  
58  
59

1  
2  
3 advice for the clinical team to consider. Screening for delirium occurred between 09:00 – 17:00 each  
4 day and occurred alongside post-take ward rounds.  
5  
6

#### 7 *Data extraction*

8  
9

10  
11 Delirium recognition was defined as a written diagnosis of delirium documented in the patient care  
12 record by the usual care team during the first 24 hours of admission, prior to screening for study  
13 purposes. Healthcare staff outside of the research team were unaware that delirium recognition was  
14 being assessed or recorded. Delirium motor subtype and dementia status, defined as an Informant  
15 Questionnaire on Cognitive Decline in the Elderly – Short Version score (IQCODE-SF) greater than  
16 3.82 (25), were recorded. Following discharge, formal discharge letters (which communicated the  
17 admission details and diagnosis to the GP) were examined for documentation of delirium as a  
18 discharge diagnosis. Text was examined for description of delirium using informal terms. In cases  
19 where patients died during admission, the medical certificate of cause of death and letter to GP  
20 were examined. Analysis of discharge summaries was completed by a single researcher (CW) who  
21 was unaware if delirium had been recognised on admission.  
22  
23

#### 24 *Statistical analysis*

25  
26

27  
28  
29 Admissions were divided temporally into categorical halves and quartiles of consecutive recruitment  
30 for analysis (i.e. first half recruited and second half recruited; first, second, third, and fourth quartiles  
31 recruited). Due to an odd total number, the additional participant was randomly allocated to the  
32 first half and the final quartile. Significance of differences in delirium recognition across groups were  
33 examined using Fisher's exact test and Chi-squared tests as appropriate using IBM SPSS Statistics 22.  
34 Data was examined with respect to differences between age, gender, delirium motor subtype,  
35 dementia status, length of stay (LOS), and mortality between groups, and between recognised and  
36 unrecognised delirium. Significance of differences in LOS and mortality was determined using  
37 Kruskal-Wallis tests. If any significant differences were found between those recognised and  
38 unrecognised, we planned to conduct logistic regression models to identify factors that predicted  
39 unrecognised delirium.  
40  
41  
42  
43

#### 44 *Patient involvement*

45  
46  
47

48 The James Lind Alliance published priority setting partnerships related to dementia in 2013, which  
49 informed further work led by the Alzheimer's society. It was identified that some of the most  
50 important priorities to patients and carers of individuals with dementia were the impact of early  
51 diagnosis, caring for people with dementia during acute hospital admissions, and how to effectively  
52 implement research findings into practice (26). Locally, a pilot study of nine individuals was  
53 undertaken prior to the initial study, which demonstrated that patients and their consultees (non-  
54 statutorily defined personal representatives who knew the patient well and who could consider their  
55 past wishes) found the assessments acceptable. Written consultee declaration was obtained from  
56  
57  
58  
59

1  
2  
3 personal consultees for research participation where patients were deemed to lack capacity to  
4 consent. The results of the main study were presented at the Age Well conference in Birmingham  
5 and disseminated to study participants and their consultees.  
6  
7

## 8 **Results**

9

10  
11  
12 Delirium was diagnosed in 228 (17.2%) of 1,327 patients screened for delirium. 125 participants  
13 were recruited between March 2013 and November 2014. Reasons for non-recruitment included  
14 lack of available consultees, risk of imminent death, inability to communicate in English, consultee  
15 declining participation, or previous recruitment. This has been described elsewhere in more detail  
16 (25). Table 1 depicts demographic data, delirium subtype, dementia status, and delirium recognition  
17 between groups. There was no difference in age, gender, delirium subtype, dementia status or  
18 inpatient mortality between the two halves. The date range for the first half of patients recruited  
19 was 4/3/2013 – 11/11/2013 and the date range for the second half was 12/11/2013 – 18/11/2014.  
20 Date ranges for quartiles of admission were 4/3/2013 – 5/6/2013, 6/6/2013 – 11/11/2013,  
21 12/11/2013 – 6/5/2014 and 7/5/2014 – 18/11/2014 respectively.  
22  
23

### 24 *Admission recognition*

25

26  
27  
28  
29 Delirium was recognised in 74/125 (59%) overall. Delirium was recognised in 30/63 (48%) in the first  
30 half, and 44/62 (71%) in the second half ( $p=0.01$ ). There was no difference in age, gender, delirium  
31 subtype, dementia status, or mortality between recognised or unrecognised delirium (Table 1). As  
32 we did not identify any significant difference between factors, we did not proceed to perform  
33 logistic regression models. Table 2 demonstrates our results divided by quartiles. Delirium  
34 recognition improved from the first quartile when compared to the second, third, and fourth  
35 quartiles (42%, 52%, 74%, 69%,  $p=0.034$ ). Motor subtype was specified on admission in 8 patients  
36 with delirium; seven of these were concordant with expert assessment at recruitment (all  
37 hypoactive). Data on LOS was available for all 113 patients who were alive at discharge. 12 month  
38 mortality (including those patients who died during admission) was available for 107 patients. There  
39 was no statistically significant difference in either LOS or 12 month mortality between patients in  
40 whom their delirium recognised compared to those in whom delirium was unrecognised.  
41  
42  
43

### 44 *Discharge documentation*

45

46  
47  
48  
49 There was no difference in recording of delirium as a diagnosis, or description of delirium in  
50 discharge summaries between the first and second halves of recruitment. There was a trend towards  
51 increased documentation of delirium as a discharge diagnosis in the second, third, and fourth  
52 quartiles compared to the first quartile (29%, 55%, 48%, 62%,  $p=0.052$ ). There was a clinical  
53 description of delirium in the discharge text of 62/113 (55%) patients. Of these patients, confusion  
54 was described in 56/62 (88%), drowsiness in 12/62 (19%), and agitation in 5/62 (8%). No patients  
55 were described as being disorientated. Of the 12 in whom drowsiness was described, all except for  
56  
57  
58  
59

1  
2  
3 one patient had a diagnosis of hypoactive delirium confirmed with expert assessment. 12 patients  
4 died during admission. None of these included delirium as a diagnosis that had caused or  
5 contributed towards their death on formal death certification, or included delirium in summaries  
6 sent to the GP in relation to the admission.  
7  
8  
9

## 10 Discussion

11  
12

13 Delirium recognition improved between the first half of recruitment and second half. There was no  
14 change in local hospital policy during this time period that may have affected this. Local hospital  
15 policy was concordant with British Geriatrics Society (BGS) and NICE guidelines, which recommend  
16 that all patients aged 65 years and older who are newly admitted to hospital are screened for  
17 delirium (24). This guidance existed throughout the course of this research project and did not  
18 change during this time. Formal delirium diagnosis was made during the initial study using  
19 recognised DSM-IV criteria by an expert; results are representative of true delirium recognition. The  
20 protocol for this study was developed and approved prior to the introduction of DSM-V and we  
21 recognise that there are differences between DSM-IV and DSM-V. However, concordance of 91%  
22 between DSM-IV and DSM-V has been demonstrated when using a relaxed approach to the DSM-V  
23 criteria (27).  
24  
25  
26  
27

28 Increased knowledge of delirium through awareness of ongoing recruitment to the main study may  
29 have aided to increase recognition. This demonstrates a potentially indirect means by which  
30 increased local research activity can improve patient outcomes. However, we did not identify any  
31 statistically significant difference in LOS, inpatient mortality, or 12 month mortality between patients  
32 in whom delirium was recognised compared to those in whom delirium was unrecognised. This may  
33 have been due to underpowering of this study and missing data at follow-up but we acknowledge that  
34 no clear correlation between delirium recognition and LOS has been demonstrated. We did not  
35 collect data on other outcomes that may have correlated with delirium recognition such as inpatient  
36 falls, avoidance of sedative medications, reduction in anticholinergic drug burden, functional status  
37 on discharge, or need for institutionalisation. Additionally, it is important to note that following  
38 delirium screening for study purposes, the presence or absence of delirium was documented in the  
39 medical notes so that intervention strategies could be put into place by the medical team. As all  
40 patients were recruited to this study within the first 24 hours of admission this will have allowed  
41 early intervention to be put into place for all patients regardless of initial recognition by the  
42 admitting team.  
43  
44  
45  
46

47 Documentation of delirium in discharge summaries did not improve during this study. This may have  
48 been due to patients being discharged from clinical areas other than the acute admissions unit, and  
49 reduced awareness by discharging physicians of the main study. However, many medical staff  
50 working in discharging areas would have rotated through the acute admissions unit. Medical staff  
51 may have been unaware of the importance of documenting delirium on discharge summaries, as this  
52 was not an aspect included in the main study. To minimise potential bias, examination of discharge  
53 summaries was performed by a separate independent researcher who was not aware of the results  
54 of the admission recognition data.  
55  
56  
57  
58  
59  
60

1  
2  
3  
4  
5 Early patient and public involvement in the planning of our research project ensured that this project  
6 was of relevance to the interests of older adults and their carers. In particular, our pilot study  
7 assisted to refine the protocol for the main study and verify the acceptability of the assessments  
8 performed. Dementia remains a priority research topic for older adults and their carers. Delirium is  
9 often less well understood by patients and members of the public compared to dementia but is  
10 considered an important problem when the condition is explained to them.  
11

12  
13  
14 Overall rates of delirium recognition compared better than previous research in other settings. The  
15 development of NICE guidelines in 2010 (24) and increased undergraduate teaching (28) are likely to  
16 have influenced this. We did not conduct follow-up assessments following completion of this study  
17 to assess if the effect was maintained. Baseline recognition rates prior to recruitment to this study  
18 were also not measured. Due to the design of this study, we were only able to assess the impact of  
19 our study upon recognition of prevalent delirium in patients included within the main study. We also  
20 did not assess the impact upon recognition of incident delirium or prevalent delirium in patients not  
21 included in the main study.  
22

23  
24  
25 We did not demonstrate a significant difference in recognition of delirium between subtypes. This is  
26 in contrast to previous research, which has demonstrated that hypoactive delirium is recognised less  
27 frequently than other subtypes (12). However, our study was not powered to detect a difference in  
28 recognition between subtypes. A non-significant difference of 52% recognition amongst hypoactive  
29 patients compared to 67% recognition amongst hyperactive and mixed subtypes was observed  
30 overall.  
31

32  
33  
34 This is the first study to show the effect of delirium research activity on delirium recognition. Our  
35 results correspond to previous studies that have demonstrated a positive effect of research activity  
36 on patient outcomes. Further research is needed to assess if similar effects are observed with  
37 research studies of alternative design. Demonstrating positive indirect benefits of research activity  
38 on patient outcomes may encourage increased engagement of hospital trusts in research. Our study  
39 demonstrates that delirium recognition can be improved through informal education and  
40 collaborative working within an acute admissions unit; a similar approach of embedding a specialist  
41 delirium or geriatric medicine team within the acute admissions unit could have a similar positive  
42 impact in clinical practice.  
43  
44

#### 45 46 47 **Funding** 48

49  
50 TAJ was supported by the Research into Ageing Fund, a fund set up and managed jointly by Age UK  
51 and the British Geriatrics Society (#367). The study sponsor had no role in study design, the  
52 collection, analysis and interpretation of data, the writing of the report, or in the decision to submit  
53 the paper for publication. CW is funded by a National Institute for Health Research (NIHR), UK,  
54 Academic Clinical Fellowship award. The views expressed are those of the authors and not  
55 necessarily those of the NHS, the NIHR, or the Department of Health.  
56  
57



### Competing interests

The authors declare that they have no competing interests.

### Author contributions

TAJ was responsible for recruitment of patients to this study and recording of delirium recognition. CW was responsible for review of delirium documentation on discharge summaries. TAJ and CW jointly performed the analysis and agreed the text of the manuscript.

### Ethical approval

This study involved participants who lacked capacity to consent; written consultee declaration was obtained from personal consultees. Ethical and regulatory approvals were obtained (Bradford Ethics Committee, part of the Yorkshire and Humber National research and Ethics Service, ref: 12/YH/0534).

### Data sharing statement

The datasets used and analysed during the current study are available from the corresponding author on reasonable request.

Table 1 – Comparison of results and patient demographics by halves

|                                 |             | All             | First half<br>n=63 | Second<br>half n=62 | p           | Recognised<br>n=74 | Unrecognised<br>n=51 | p    |
|---------------------------------|-------------|-----------------|--------------------|---------------------|-------------|--------------------|----------------------|------|
| Age                             | Mean (SD)   | 84.4            | 83.78              | 85.03               | 0.18        | 85 (5.8)           | 84 (7.4)             | 0.65 |
| Gender                          | Male        | 47 (38%)        | 27 (43%)           | 20 (32%)            | 0.27        | 27 (36%)           | 20 (39%)             | 0.85 |
| Subtype                         | Hyperactive | 37 (29%)        | 18 (29%)           | 19 (31%)            |             | 25 (34%)           | 12 (23%)             |      |
|                                 | Hypoactive  | 67 (54%)        | 34 (54%)           | 33 (53%)            | 0.96        | 35 (47%)           | 32 (63%)             | 0.23 |
|                                 | Mixed       | 21 (17%)        | 11 (17%)           | 10 (16%)            |             | 14 (19%)           | 7 (14%)              |      |
| IQCODE > 3.82                   |             | 71 (57%)        | 36 (57%)           | 35 (56%)            | 0.77        | 31 (42%)           | 15 (29%)             | 0.97 |
| Inpatient mortality             |             | 12 (10%)        | 5 (8%)             | 7 (11%)             | 0.73        | 8 (11%)            | 4 (8%)               | 0.76 |
| Delirium recognised             |             | <b>74 (59%)</b> | <b>30 (48%)</b>    | <b>44 (71%)</b>     | <b>0.01</b> | NA                 | NA                   | NA   |
| Delirium as discharge diagnosis |             | 61 (49%)        | 26 (41%)           | 35 (56%)            | 0.11        | NA                 | NA                   | NA   |
| Delirium described on discharge |             | 62 (50%)        | 33 (52%)           | 29 (47%)            | 0.59        | NA                 | NA                   | NA   |
|                                 |             | All             | First half<br>n=57 | Second<br>half n=56 | p           | Recognised<br>n=66 | Unrecognised<br>n=47 | p    |
| Median LOS (days)               |             | 16              | 17                 | 13.5                | 0.43        | 17                 | 13.5                 | 0.18 |
|                                 |             | All             | First half<br>n=54 | Second<br>half n=53 | p           | Recognised<br>n=64 | Unrecognised<br>n=43 | p    |
| 12 month mortality              |             | 42 (39%)        | 24 (44%)           | 18 (34%)            | 0.27        | 26 (41%)           | 16 (37%)             | 0.72 |

Delirium recognition improved between the first half of recruitment to the second half of recruitment. There was no difference in age, gender, delirium subtype, dementia status, or mortality between halves of recruitment or between recognised and unrecognised delirium.

**Table 2 – Comparison of results by quartiles**

|                                        | First quartile<br>(n=31) | Second<br>quartile<br>(n=31) | Third<br>quartile<br>(n=31) | Fourth<br>quartile<br>(n=32) | p value     |
|----------------------------------------|--------------------------|------------------------------|-----------------------------|------------------------------|-------------|
| <b>Delirium recognised</b>             | <b>13 (42%)</b>          | <b>16 (52%)</b>              | <b>23 (74%)</b>             | <b>22 (69%)</b>              | <b>0.03</b> |
| <b>Delirium as discharge diagnosis</b> | 9 (29%)                  | 17 (55%)                     | 15 (48%)                    | 20 (62%)                     | 0.052       |
| <b>Delirium described on discharge</b> | 18 (58%)                 | 14 (45%)                     | 12 (39%)                    | 18 (56%)                     | 0.37        |

Delirium recognition improved between the first quartile and the second, third and fourth quartile. There was a trend towards increased documentation of delirium as a discharge diagnosis between the first and the second, third and fourth quartiles.

## References

1. Ozdemir BA, Karthikesalingam A, Sinha S, Poloniecki JD, Hinchliffe RJ, Thompson MM, et al. Research Activity and the Association with Mortality. *PLOS ONE*. 2015;10(2):e0118253.
2. Lichten CA, Marsden G, Pollitt A, Kiparoglou V, Channon KM, Sussex J. Does a biomedical research centre affect patient care in local hospitals? *Health Research Policy and Systems*. 2017;15(1):2.
3. García-Romero A, Escribano Á, Tribó JA. The impact of health research on length of stay in Spanish public hospitals. *Research Policy*. 2017;46(3):591-604.
4. Boaz A, Hanney S, Jones T, Soper B. Does the engagement of clinicians and organisations in research improve healthcare performance: a three-stage review. *BMJ Open*. 2015;5(12).
5. American Psychiatric Association. *Diagnostic and Statistical Manual of Mental Disorders (DSM-5®)*. 5 ed 2013.
6. Ryan DJ, O'Regan NA, Caoimh RÓ, Clare J, O'Connor M, Leonard M, et al. Delirium in an adult acute hospital population: predictors, prevalence and detection. *BMJ Open*. 2013;3(1).
7. Ely E, Inouye SK, Bernard GR, et al. Delirium in mechanically ventilated patients: Validity and reliability of the confusion assessment method for the intensive care unit (cam-icu). *Jama*. 2001;286(21):2703-10.
8. MacLulich AM, Anand A, Davis DH, Jackson T, Barugh AJ, Hall RJ, et al. New horizons in the pathogenesis, assessment and management of delirium. *Age Ageing*. 2013;42(6):667-74.
9. Vasilevskis EE, Han JH, Hughes CG, Ely EW. Epidemiology and risk factors for delirium across hospital settings. *Best practice & research Clinical anaesthesiology*. 2012;26(3):277-87.
10. Teodorczuk A, Reynish E, Milisen K. Improving recognition of delirium in clinical practice: a call for action. *BMC Geriatrics*. 2012;12(1):55.
11. Laurila JV, Pitkala KH, Strandberg TE, Tilvis RS. Detection and documentation of dementia and delirium in acute geriatric wards. *General hospital psychiatry*. 2004;26(1):31-5.
12. Collins N, Blanchard MR, Tookman A, Sampson EL. Detection of delirium in the acute hospital. *Age Ageing*. 2010;39(1):131-5.
13. Bellelli G, Nobili A, Annoni G, Morandi A, Djade CD, Meagher DJ, et al. Under-detection of delirium and impact of neurocognitive deficits on in-hospital mortality among acute geriatric and medical wards. *European journal of internal medicine*. 2015;26(9):696-704.
14. Dramé M, Lang PO, Novella JL, Narbey D, Mahmoudi R, Lanièce I, et al. Six-month outcome of elderly people hospitalized via the emergency department: The SAFES cohort. *Revue d'Épidémiologie et de Santé Publique*. 2012;60(3):189-96.
15. Heymann A, Radtke F, Schiemann A, Lutz A, MacGuill M, Wernecke KD, et al. Delayed treatment of delirium increases mortality rate in intensive care unit patients. *J Int Med Res*. 2010;38(5):1584-95.
16. Bellelli G, Nobili A, Annoni G, Morandi A, Djade CD, Meagher DJ, et al. Under-detection of delirium and impact of neurocognitive deficits on in-hospital mortality among acute geriatric and medical wards. *European Journal of Internal Medicine*. 2015;26(9):696-704.
17. Kakuma R, du Fort GG, Arsenault L, Perrault A, Platt RW, Monette J, et al. Delirium in older emergency department patients discharged home: effect on survival. *J Am Geriatr Soc*. 2003;51(4):443-50.
18. Jackson TA, Wilson D, Richardson S, Lord JM. Predicting outcome in older hospital patients with delirium: a systematic literature review. *Int J Geriatr Psychiatry*. 2016;31(4):392-9.
19. Inouye SK, Westendorp RG, Saczynski JS. Delirium in elderly people. *Lancet (London, England)*. 2014;383(9920):911-22.
20. Luetz A, Weiss B, Boettcher S, Burmeister J, Wernecke KD, Spies C. Routine delirium monitoring is independently associated with a reduction of hospital mortality in critically ill surgical patients: A prospective, observational cohort study. *Journal of critical care*. 2016;35:168-73.

- 1  
2  
3 21. Clegg A, Westby M, Young JB. Under-reporting of delirium in the NHS. *Age and Ageing*. 2011;40(2):283-6.  
4  
5 22. Jenkin RPL, Al-Attar A, Richardson S, Myint PK, MacLulich AMJ, Davis DHJ. Increasing delirium skills at the front door: results from a repeated survey on delirium knowledge and attitudes. *Age and Ageing*. 2016;45(4):517-22.  
6  
7 23. Jenkin RPL, Musonda P, MacLulich AMJ, Myint PK, Davis DHJ. Specialty experience in geriatric medicine is associated with a small increase in knowledge of delirium. *Age and Ageing*. 2014;43(1):141-4.  
8  
9 24. National Institute for health and Clinical Excellence (NICE). Delirium: prevention, diagnosis and management - Clinical guideline [CG103]. 2010.  
10  
11 25. Jackson TA, MacLulich AMJ, Gladman JRF, Lord JM, Sheehan B. Diagnostic test accuracy of informant-based tools to diagnose dementia in older hospital patients with delirium: a prospective cohort study. *Age and Ageing*. 2016;45(4):505-11.  
12  
13 26. James Lind Alliance. Priority Setting Partnerships - Dementia Top 10. NIHR Evaluation, Trials and Studies Coordinating Centre; 2013.  
14  
15 27. Meagher DJ, Morandi A, Inouye SK, Ely W, Adamis D, MacLulich AJ, et al. Concordance between DSM-IV and DSM-5 criteria for delirium diagnosis in a pooled database of 768 prospectively evaluated patients using the delirium rating scale-revised-98. *BMC Medicine*. 2014;12(1):164.  
16  
17 28. Fisher JM, Gordon AL, MacLulich AM, Tullo E, Davis DH, Blundell A, et al. Towards an understanding of why undergraduate teaching about delirium does not guarantee gold-standard practice--results from a UK national survey. *Age Ageing*. 2015;44(1):166-70.  
18  
19  
20  
21  
22  
23  
24  
25  
26  
27  
28  
29  
30  
31  
32  
33  
34  
35  
36  
37  
38  
39  
40  
41  
42  
43  
44  
45  
46  
47  
48  
49  
50  
51  
52  
53  
54  
55  
56  
57  
58  
59  
60

# Reporting checklist for cohort study.

Based on the STROBE cohort guidelines.

## Instructions to authors

Complete this checklist by entering the page numbers from your manuscript where readers will find each of the items listed below.

Your article may not currently address all the items on the checklist. Please modify your text to include the missing information. If you are certain that an item does not apply, please write "n/a" and provide a short explanation.

Upload your completed checklist as an extra file when you submit to a journal.

In your methods section, say that you used the STROBE cohort reporting guidelines, and cite them as:

von Elm E, Altman DG, Egger M, Pocock SJ, Gotsche PC, Vandembroucke JP. The Strengthening the Reporting of Observational Studies in Epidemiology (STROBE) Statement: guidelines for reporting observational studies.

|                        |     | Reporting Item                                                                                                                  | Page Number |
|------------------------|-----|---------------------------------------------------------------------------------------------------------------------------------|-------------|
| Title                  | #1a | Indicate the study's design with a commonly used term in the title or the abstract                                              | 1           |
| Abstract               | #1b | Provide in the abstract an informative and balanced summary of what was done and what was found                                 | 1           |
| Background / rationale | #2  | Explain the scientific background and rationale for the investigation being reported                                            | 2           |
| Objectives             | #3  | State specific objectives, including any prespecified hypotheses                                                                | 3           |
| Study design           | #4  | Present key elements of study design early in the paper                                                                         | 3           |
| Setting                | #5  | Describe the setting, locations, and relevant dates, including periods of recruitment, exposure, follow-up, and data collection | 3           |
| Eligibility criteria   | #6a | Give the eligibility criteria, and the sources and methods of selection of participants. Describe methods of follow-up.         | 3           |

|    |                  |      |                                                                   |   |
|----|------------------|------|-------------------------------------------------------------------|---|
| 1  |                  | #6b  | For matched studies, give matching criteria and number of         | 3 |
| 2  |                  |      | exposed and unexposed                                             |   |
| 3  |                  |      |                                                                   |   |
| 4  |                  |      |                                                                   |   |
| 5  | Variables        | #7   | Clearly define all outcomes, exposures, predictors, potential     | 3 |
| 6  |                  |      | confounders, and effect modifiers. Give diagnostic criteria, if   |   |
| 7  |                  |      | applicable                                                        |   |
| 8  |                  |      |                                                                   |   |
| 9  |                  |      |                                                                   |   |
| 10 | Data sources /   | #8   | For each variable of interest give sources of data and details of | 3 |
| 11 | measurement      |      | methods of assessment (measurement). Describe                     |   |
| 12 |                  |      | comparability of assessment methods if there is more than one     |   |
| 13 |                  |      | group. Give information separately for for exposed and            |   |
| 14 |                  |      | unexposed groups if applicable.                                   |   |
| 15 |                  |      |                                                                   |   |
| 16 |                  |      |                                                                   |   |
| 17 |                  |      |                                                                   |   |
| 18 | Bias             | #9   | Describe any efforts to address potential sources of bias         | 3 |
| 19 |                  |      |                                                                   |   |
| 20 |                  |      |                                                                   |   |
| 21 | Study size       | #10  | Explain how the study size was arrived at                         | 3 |
| 22 |                  |      |                                                                   |   |
| 23 | Quantitative     | #11  | Explain how quantitative variables were handled in the            | 4 |
| 24 | variables        |      | analyses. If applicable, describe which groupings were chosen,    |   |
| 25 |                  |      | and why                                                           |   |
| 26 |                  |      |                                                                   |   |
| 27 |                  |      |                                                                   |   |
| 28 | Statistical      | #12a | Describe all statistical methods, including those used to control | 4 |
| 29 | methods          |      | for confounding                                                   |   |
| 30 |                  |      |                                                                   |   |
| 31 |                  |      |                                                                   |   |
| 32 |                  | #12b | Describe any methods used to examine subgroups and                | 4 |
| 33 |                  |      | interactions                                                      |   |
| 34 |                  |      |                                                                   |   |
| 35 |                  |      |                                                                   |   |
| 36 |                  | #12c | Explain how missing data were addressed                           | 4 |
| 37 |                  |      |                                                                   |   |
| 38 |                  | #12d | If applicable, explain how loss to follow-up was addressed        | 4 |
| 39 |                  |      |                                                                   |   |
| 40 |                  |      |                                                                   |   |
| 41 |                  | #12e | Describe any sensitivity analyses                                 | 4 |
| 42 |                  |      |                                                                   |   |
| 43 | Participants     | #13a | Report numbers of individuals at each stage of study—eg           | 4 |
| 44 |                  |      | numbers potentially eligible, examined for eligibility, confirmed |   |
| 45 |                  |      | eligible, included in the study, completing follow-up, and        |   |
| 46 |                  |      | analysed. Give information separately for for exposed and         |   |
| 47 |                  |      | unexposed groups if applicable.                                   |   |
| 48 |                  |      |                                                                   |   |
| 49 |                  |      |                                                                   |   |
| 50 |                  |      |                                                                   |   |
| 51 |                  | #13b | Give reasons for non-participation at each stage                  | 4 |
| 52 |                  |      |                                                                   |   |
| 53 |                  | #13c | Consider use of a flow diagram                                    | 4 |
| 54 |                  |      |                                                                   |   |
| 55 |                  |      |                                                                   |   |
| 56 | Descriptive data | #14a | Give characteristics of study participants (eg demographic,       | 8 |
| 57 |                  |      | clinical, social) and information on exposures and potential      |   |
| 58 |                  |      |                                                                   |   |
| 59 |                  |      |                                                                   |   |
| 60 |                  |      |                                                                   |   |

|    |                  |                                                                        |   |
|----|------------------|------------------------------------------------------------------------|---|
| 1  |                  | confounders. Give information separately for exposed and               |   |
| 2  |                  | unexposed groups if applicable.                                        |   |
| 3  |                  |                                                                        |   |
| 4  |                  | #14b Indicate number of participants with missing data for each        | 4 |
| 5  |                  | variable of interest                                                   |   |
| 6  |                  |                                                                        |   |
| 7  |                  | #14c Summarise follow-up time (eg, average and total amount)           | 4 |
| 8  |                  |                                                                        |   |
| 9  |                  |                                                                        |   |
| 10 | Outcome data     | #15 Report numbers of outcome events or summary measures               | 8 |
| 11 |                  | over time. Give information separately for exposed and                 |   |
| 12 |                  | unexposed groups if applicable.                                        |   |
| 13 |                  |                                                                        |   |
| 14 |                  |                                                                        |   |
| 15 | Main results     | #16a Give unadjusted estimates and, if applicable, confounder-         | 8 |
| 16 |                  | adjusted estimates and their precision (eg, 95% confidence             |   |
| 17 |                  | interval). Make clear which confounders were adjusted for and          |   |
| 18 |                  | why they were included                                                 |   |
| 19 |                  |                                                                        |   |
| 20 |                  |                                                                        |   |
| 21 |                  |                                                                        |   |
| 22 |                  | #16b Report category boundaries when continuous variables were         | 8 |
| 23 |                  | categorized                                                            |   |
| 24 |                  |                                                                        |   |
| 25 |                  |                                                                        |   |
| 26 |                  | #16c If relevant, consider translating estimates of relative risk into | 8 |
| 27 |                  | absolute risk for a meaningful time period                             |   |
| 28 |                  |                                                                        |   |
| 29 |                  |                                                                        |   |
| 30 | Other analyses   | #17 Report other analyses done—e.g., analyses of subgroups and         | 9 |
| 31 |                  | interactions, and sensitivity analyses                                 |   |
| 32 |                  |                                                                        |   |
| 33 |                  |                                                                        |   |
| 34 | Key results      | #18 Summarise key results with reference to study objectives           | 5 |
| 35 |                  |                                                                        |   |
| 36 | Limitations      | #19 Discuss limitations of the study, taking into account sources of   | 5 |
| 37 |                  | potential bias or imprecision. Discuss both direction and              |   |
| 38 |                  | magnitude of any potential bias.                                       |   |
| 39 |                  |                                                                        |   |
| 40 |                  |                                                                        |   |
| 41 | Interpretation   | #20 Give a cautious overall interpretation considering objectives,     | 5 |
| 42 |                  | limitations, multiplicity of analyses, results from similar studies,   |   |
| 43 |                  | and other relevant evidence.                                           |   |
| 44 |                  |                                                                        |   |
| 45 |                  |                                                                        |   |
| 46 | Generalisability | #21 Discuss the generalisability (external validity) of the study      | 6 |
| 47 |                  | results                                                                |   |
| 48 |                  |                                                                        |   |
| 49 |                  |                                                                        |   |
| 50 | Funding          | #22 Give the source of funding and the role of the funders for the     | 6 |
| 51 |                  | present study and, if applicable, for the original study on which      |   |
| 52 |                  | the present article is based                                           |   |
| 53 |                  |                                                                        |   |
| 54 |                  |                                                                        |   |
| 55 |                  |                                                                        |   |

The STROBE checklist is distributed under the terms of the Creative Commons Attribution License CC-BY. This checklist was completed on 04. April 2018 using <http://www.goodreports.org/>, a tool made by the [EQUATOR Network](#) in collaboration with [Penelope.ai](#)
